# Supplementary material
Source: PubMed Central journal article supplement (PMC3446636)
Supplement: ja304419t_si_003.pdf [file ja304419t_si_003.pdf]

## Supplementary Material for

# A price to be paid for two-metal catalysis: Magnesium ions that accelerate chemistry unavoidably limit product release from CDK2 kinase.

*Douglas M. Jacobsen<sup>†</sup>, Zhao-Qin Bao<sup>‡</sup>, Patrick O'Brien<sup>§</sup>, Charles L. Brooks III<sup>◇,Δ</sup>, Matthew A.  
Young<sup>‡,Δ,\*</sup>*

<sup>†</sup>Department of Computational Biology and Bioinformatics, <sup>‡</sup>Department of Pharmacology,  
<sup>§</sup>Department of Biological Chemistry, <sup>◇</sup>Department of Chemistry, <sup>Δ</sup>Department of Biophysics.

University of Michigan, Ann Arbor, Michigan 48109, United States

\*Corresponding Author Email Address: [youngmat@umich.edu](mailto:youngmat@umich.edu)

SUPPLEMENTARY FIGURES

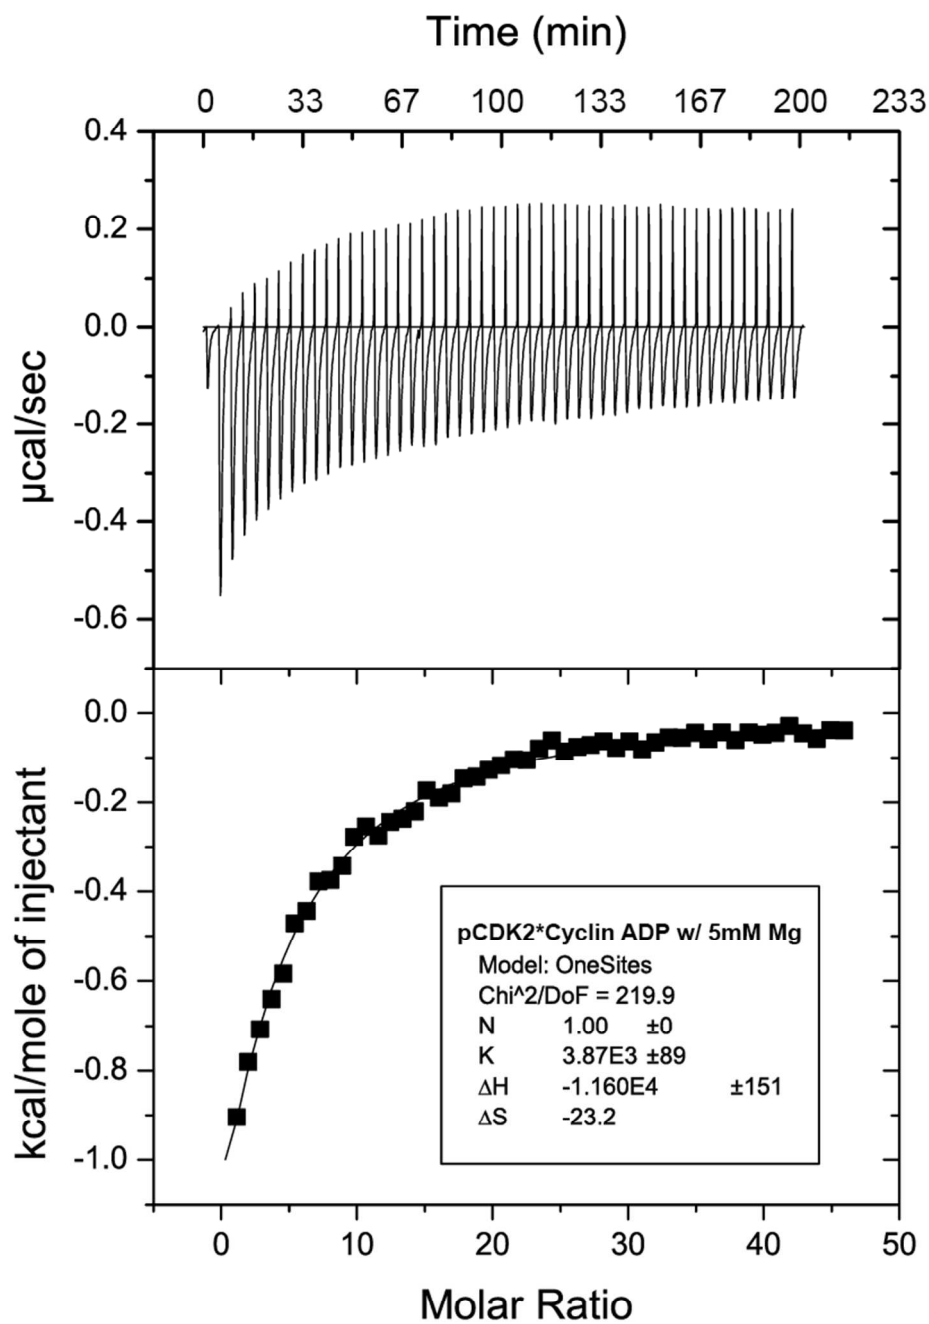

Supplemental Figure 1 ITC of pCDK2•CyclinA binding ADP with 5 mM  $[\text{Mg}^{2+}]_{\text{Total}}$ .

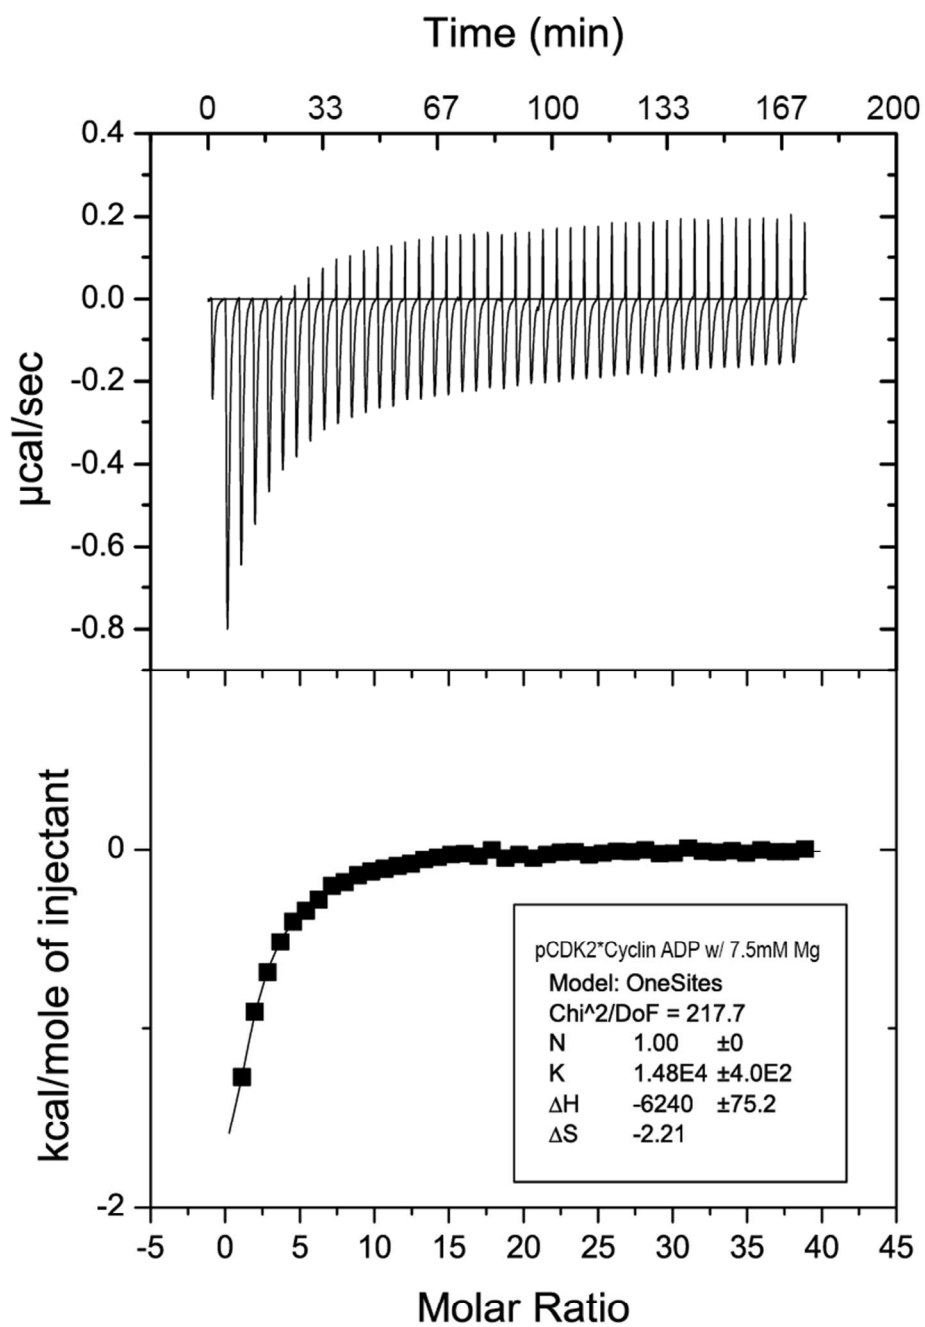

Supplemental Figure 2 ITC of pCDK2•CyclinA binding ADP with 7.5 mM  $[Mg^{2+}]_{Total}$ .

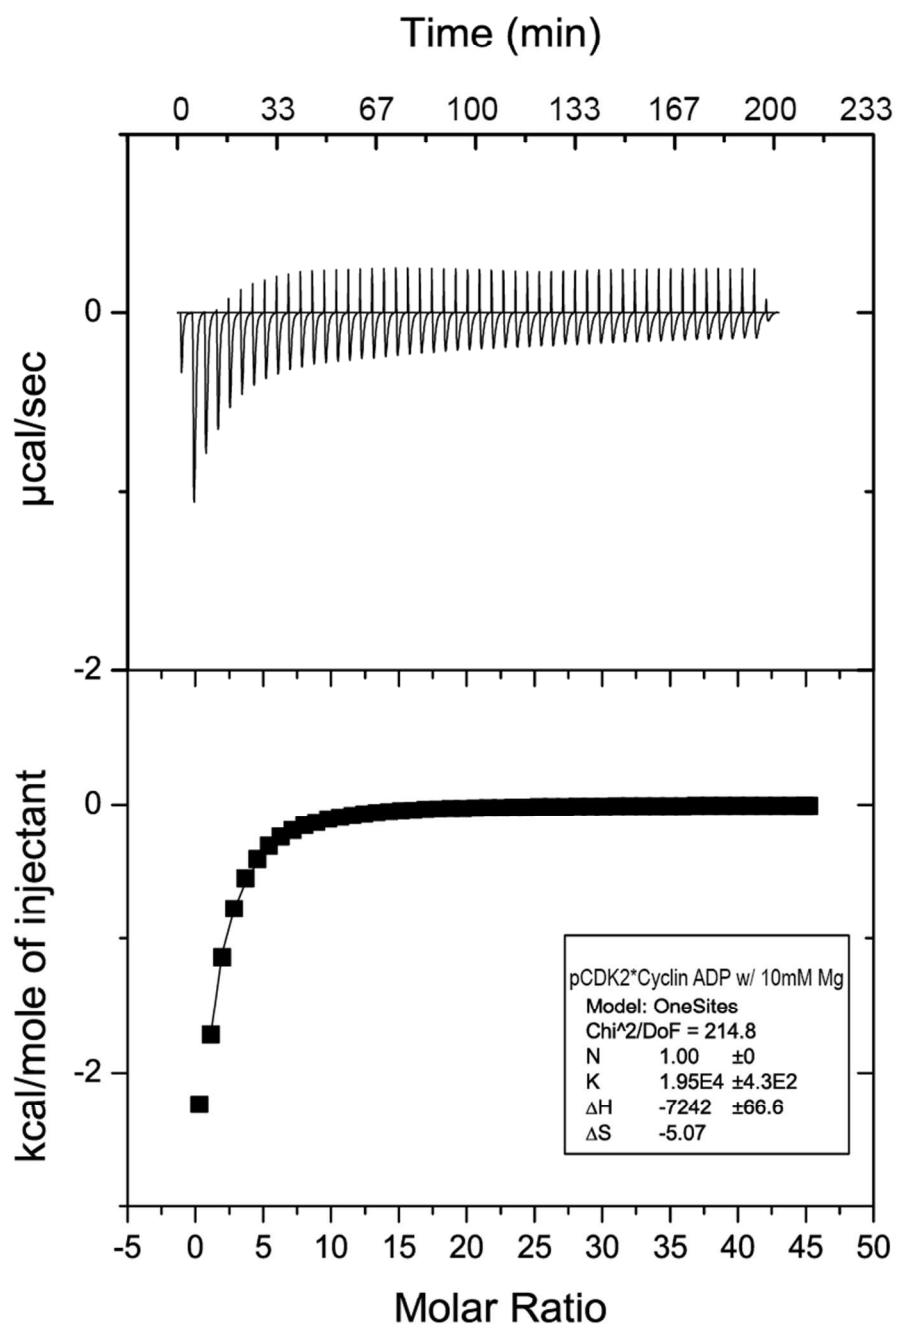

Supplemental Figure 3 ITC of pCDK2•CyclinA binding ADP with 10 mM  $[Mg^{2+}]_{Total}$ .

## KM ATP\*Mg 0.025mM [MgFree]

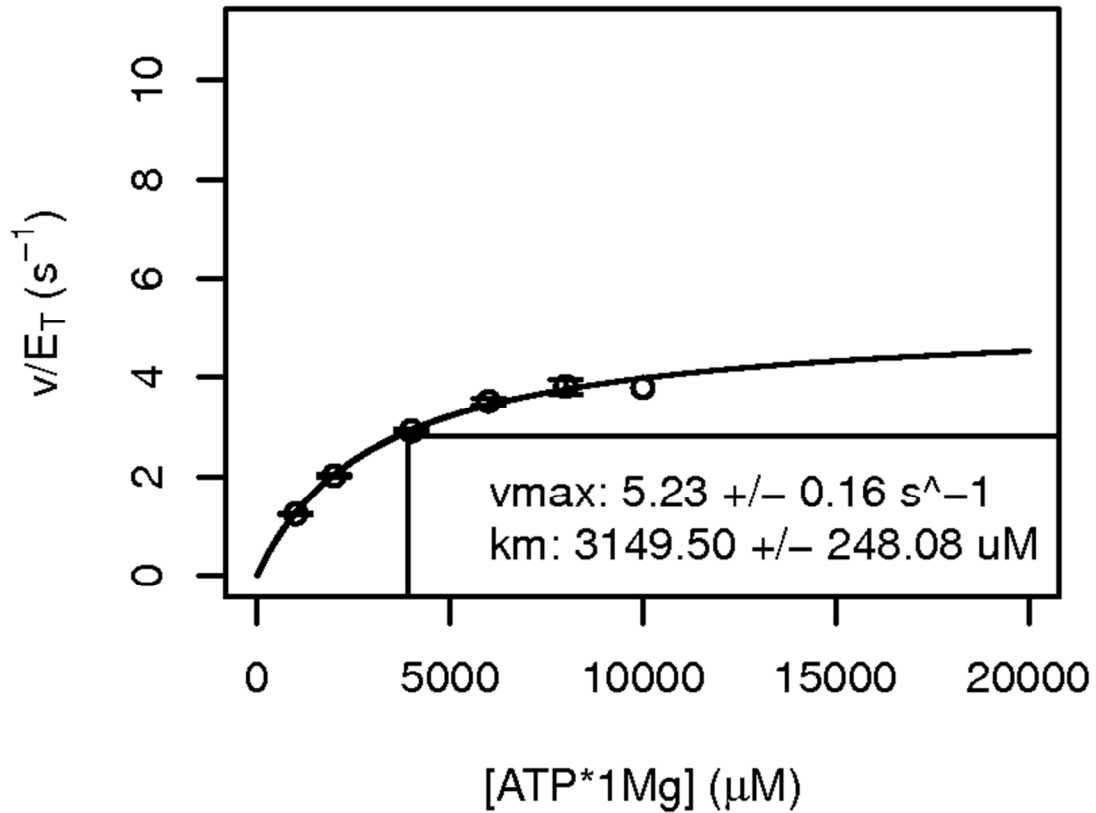

*Supplemental Figure 4*  $K_M$  for ATP•Mg substrate at 200  $\mu M$  [H1], 0.025 mM  $[Mg^{2+}]_{Free}$ . Error bars represent standard error for data point among multiple observations. KM curve fit using nonlinear least squares method to equation  $v/E_t = (v_{max} \cdot [ATP \cdot 1Mg]) / (k_m + [ATP \cdot 1Mg])$ . Total amounts of ATP/MgCl<sub>2</sub> calculated using  $K_D(ATP \cdot 1Mg) = 28.6 \mu M$ .

## KM ATP\*Mg 0.05mM [MgFree]

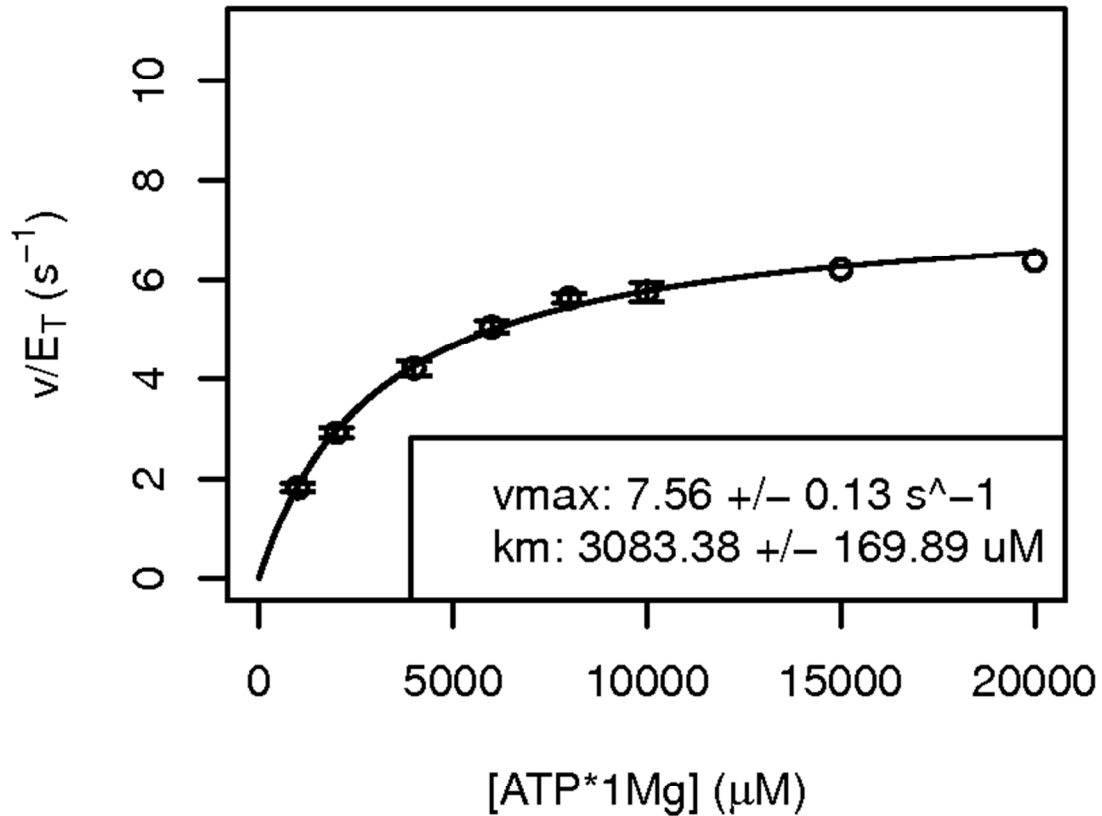

*Supplemental Figure 5*  $K_M$  for ATP•Mg substrate at 200  $\mu M$  [H1], 0.05 mM  $[Mg^{2+}]_{Free}$ . Error bars represent standard error for data point among multiple observations. KM curve fit using nonlinear least squares method to equation  $v/E_t = (v_{max} \cdot [ATP \cdot 1Mg]) / (k_m + [ATP \cdot 1Mg])$ . Total amounts of ATP/MgCl<sub>2</sub> calculated using  $K_D(ATP \cdot 1Mg) = 28.6 \mu M$ .

## KM ATP\*Mg 0.1mM [MgFree]

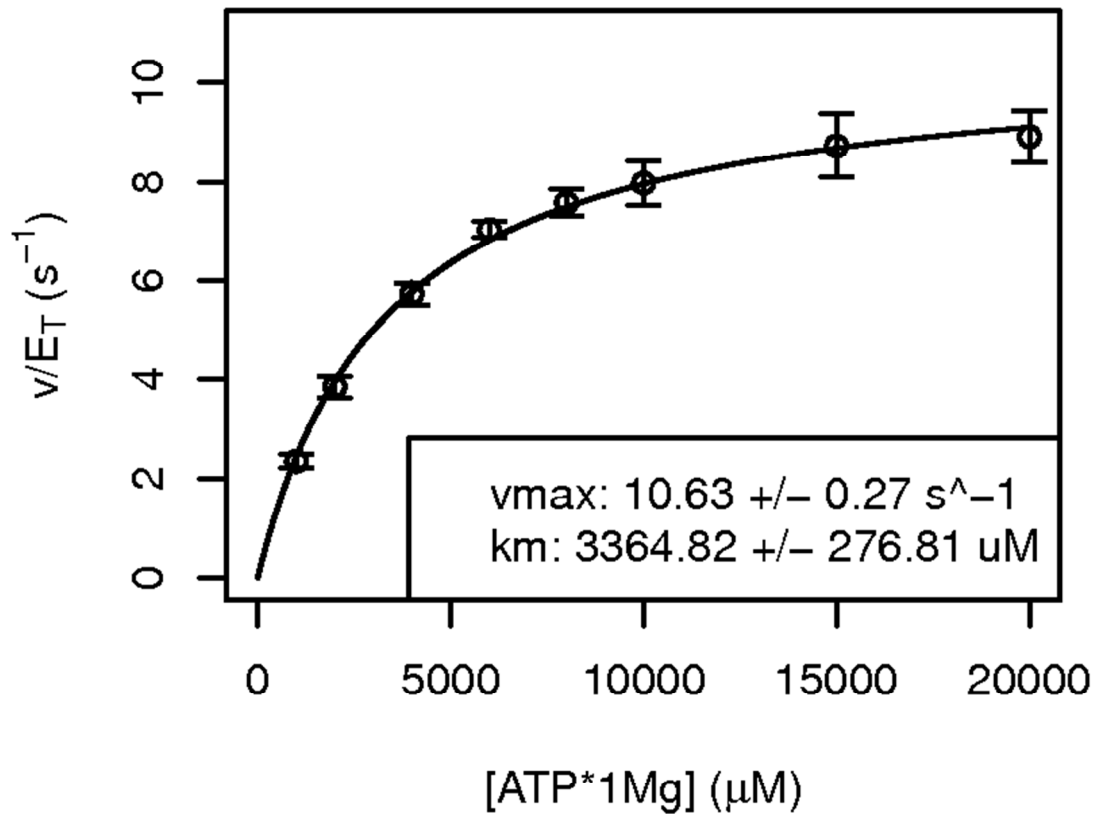

*Supplemental Figure 6*  $K_M$  for ATP•Mg substrate at 200  $\mu M$  [H1], 0.1 mM  $[Mg^{2+}]_{Free}$ . Error bars represent standard error for data point among multiple observations. KM curve fit using nonlinear least squares method to equation  $v/E_t = (v_{max} \cdot [ATP \cdot 1Mg]) / (k_m + [ATP \cdot 1Mg])$ . Total amounts of ATP/MgCl<sub>2</sub> calculated using  $K_D(ATP \cdot 1Mg) = 28.6 \mu M$ .

## KM ATP\*Mg 0.5mM [MgFree]

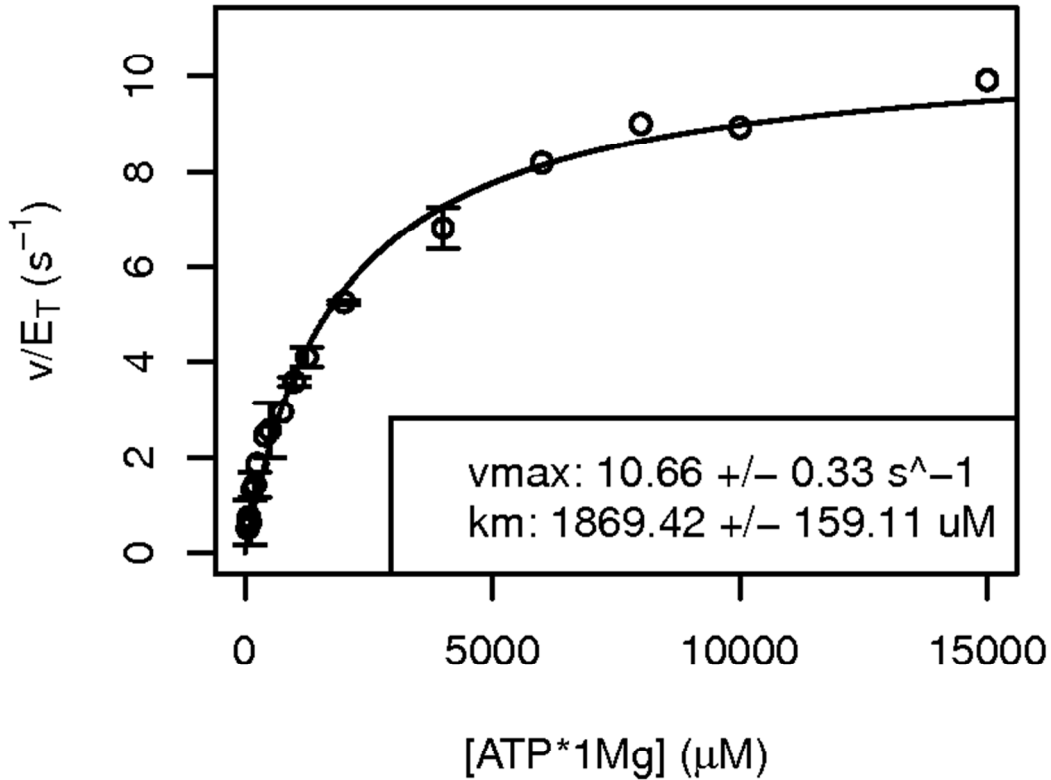

*Supplemental Figure 7*  $K_M$  for ATP•Mg substrate at 200  $\mu M$  [H1], 0.5 mM  $[Mg^{2+}]_{Free}$ . Error bars represent standard error for data point among multiple observations. KM curve fit using nonlinear least squares method to equation  $v/E_t = (v_{max} * [ATP \cdot 1Mg]) / (k_m + [ATP \cdot 1Mg])$ . Total amounts of ATP/MgCl<sub>2</sub> calculated using  $K_D(ATP \cdot 1Mg) = 28.6 \mu M$ .



## KM ATP\*Mg 1mM [MgFree]

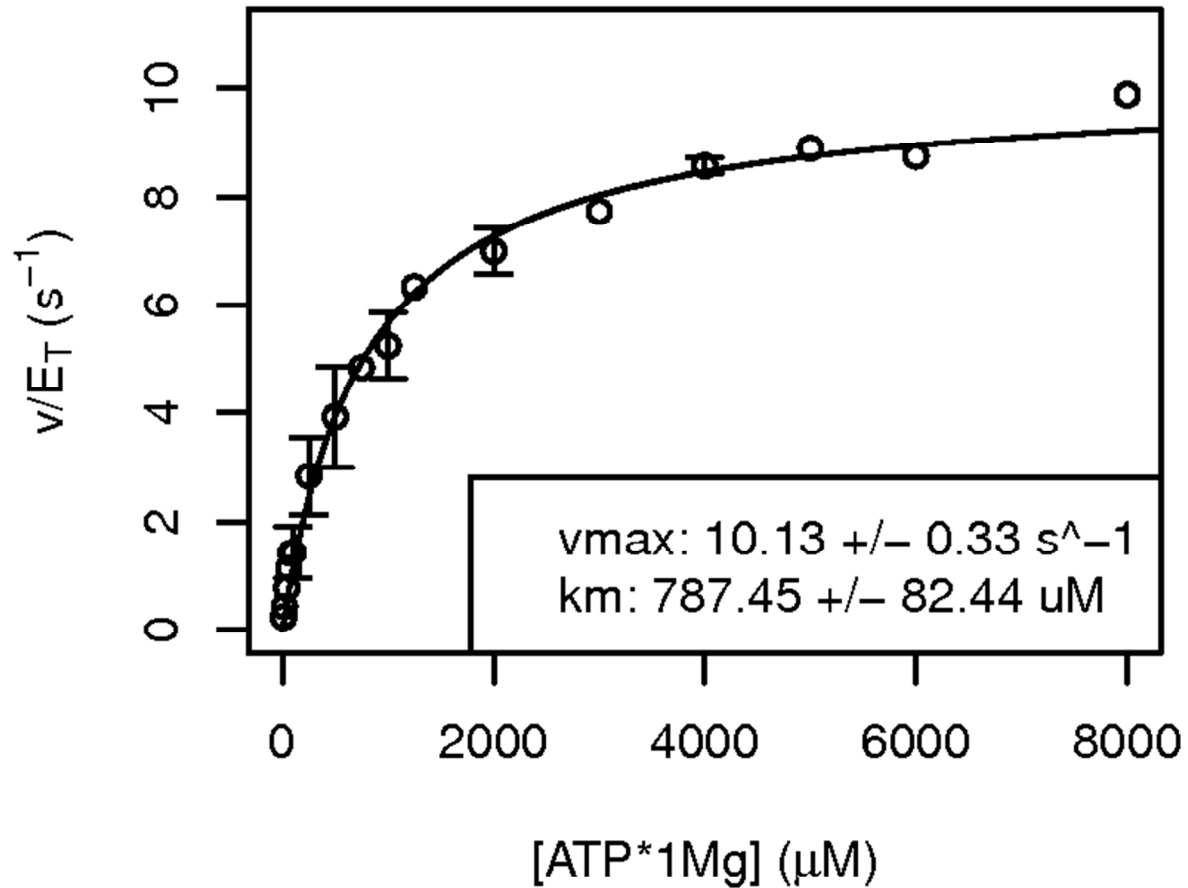

Supplemental Figure 8  $K_M$  for ATP•Mg substrate at 200  $\mu\text{M}$  [H1], 1 mM  $[\text{Mg}^{2+}]_{\text{Free}}$ . Error bars represent standard error for data point among multiple observations. KM curve fit using nonlinear least squares method to equation  $v/E_t = (v_{\text{max}} \cdot [\text{ATP} \cdot 1\text{Mg}]) / (k_m + [\text{ATP} \cdot 1\text{Mg}])$ . Total amounts of ATP/MgCl<sub>2</sub> calculated using  $K_D(\text{ATP} \cdot 1\text{Mg}) = 28.6 \mu\text{M}$ .

## KM ATP\*Mg 2.5mM [MgFree]

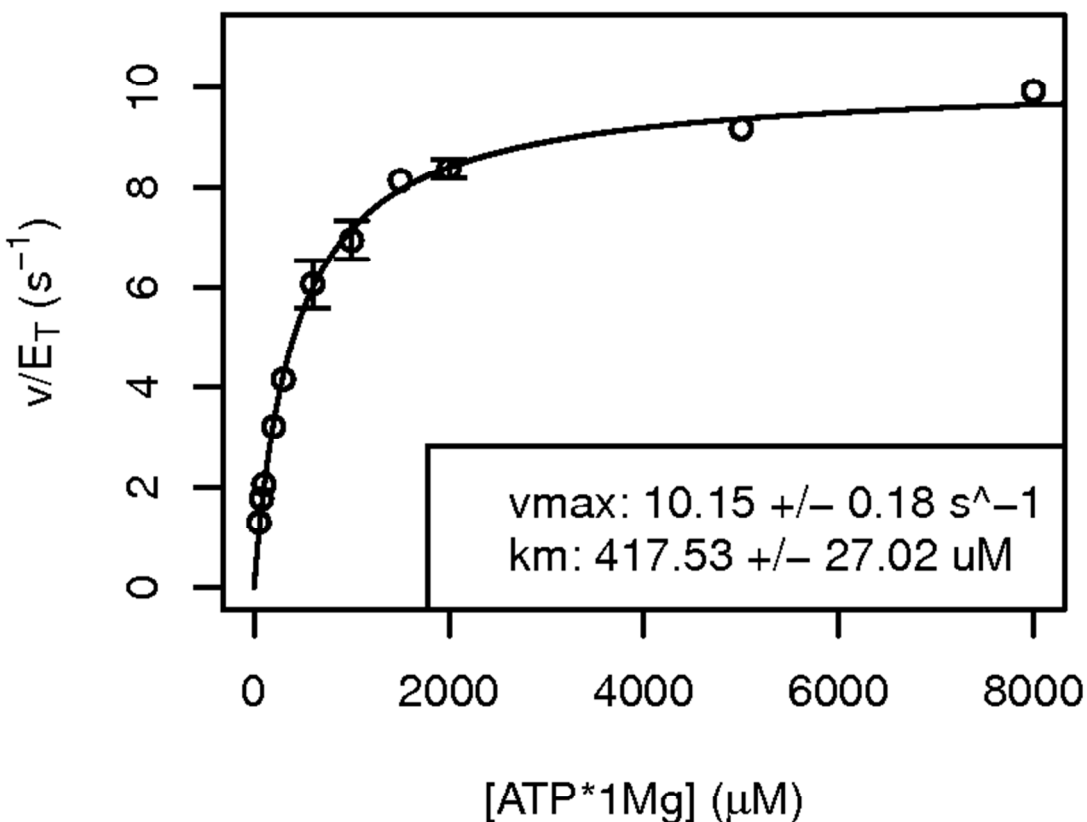

*Supplemental Figure 9*  $K_M$  for ATP•Mg substrate at 200  $\mu M$  [H1], 2.5 mM  $[Mg^{2+}]_{Free}$ . Error bars represent standard error for data point among multiple observations. KM curve fit using nonlinear least squares method to equation  $v/E_t = (v_{max} \cdot [ATP \cdot 1Mg]) / (k_m + [ATP \cdot 1Mg])$ . Total amounts of ATP/MgCl<sub>2</sub> calculated using  $K_D(ATP \cdot 1Mg) = 28.6 \mu M$ .

## KM ATP\*Mg 5mM [MgFree]

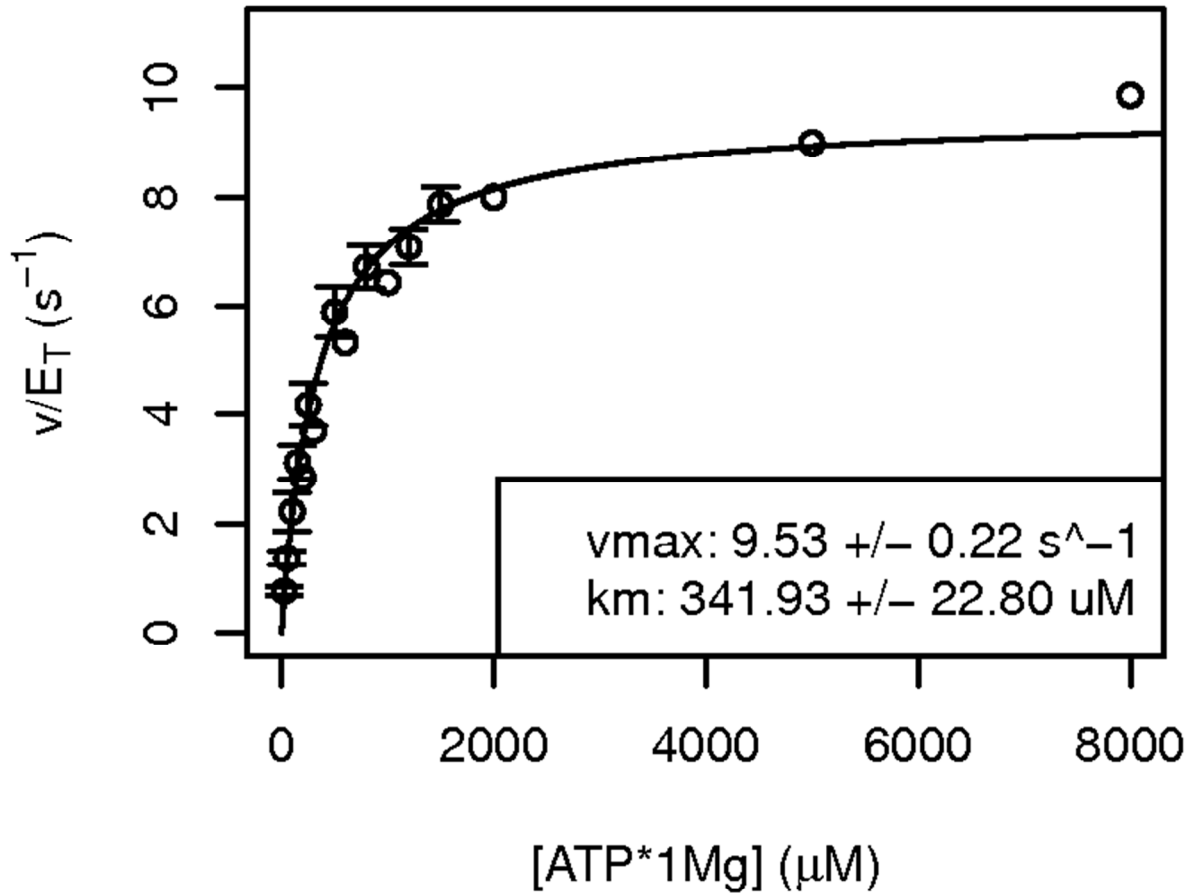

*Supplemental Figure 10*  $K_M$  for ATP•Mg substrate at 200  $\mu\text{M}$  [H1], 5 mM  $[\text{Mg}^{2+}]_{\text{Free}}$ . Error bars represent standard error for data point among multiple observations. KM curve fit using nonlinear least squares method to equation  $v/E_T = (v_{\text{max}} \cdot [\text{ATP} \cdot 1\text{Mg}]) / (k_m + [\text{ATP} \cdot 1\text{Mg}])$ . Total amounts of ATP/MgCl<sub>2</sub> calculated using  $K_D(\text{ATP} \cdot 1\text{Mg}) = 28.6 \mu\text{M}$ .

## KM ATP\*Mg 7.5mM [MgFree]

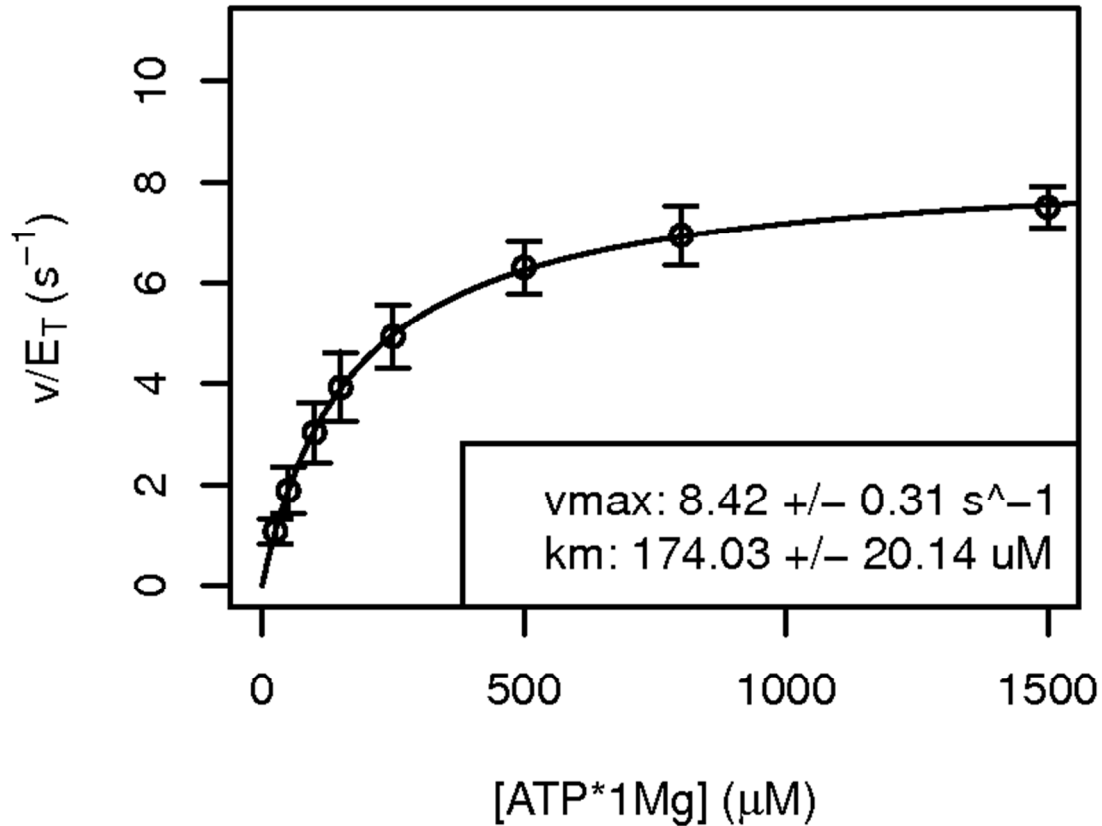

*Supplemental Figure 11*  $K_M$  for ATP•Mg substrate at 200  $\mu M$  [H1], 7.5 mM  $[Mg^{2+}]_{Free}$ . Error bars represent standard error for data point among multiple observations. KM curve fit using nonlinear least squares method to equation  $v/E_t = (v_{max} \cdot [ATP \cdot 1Mg]) / (k_m + [ATP \cdot 1Mg])$ . Total amounts of ATP/MgCl<sub>2</sub> calculated using  $K_D(ATP \cdot 1Mg) = 28.6 \mu M$ .

## KM ATP•Mg 10mM [MgFree]

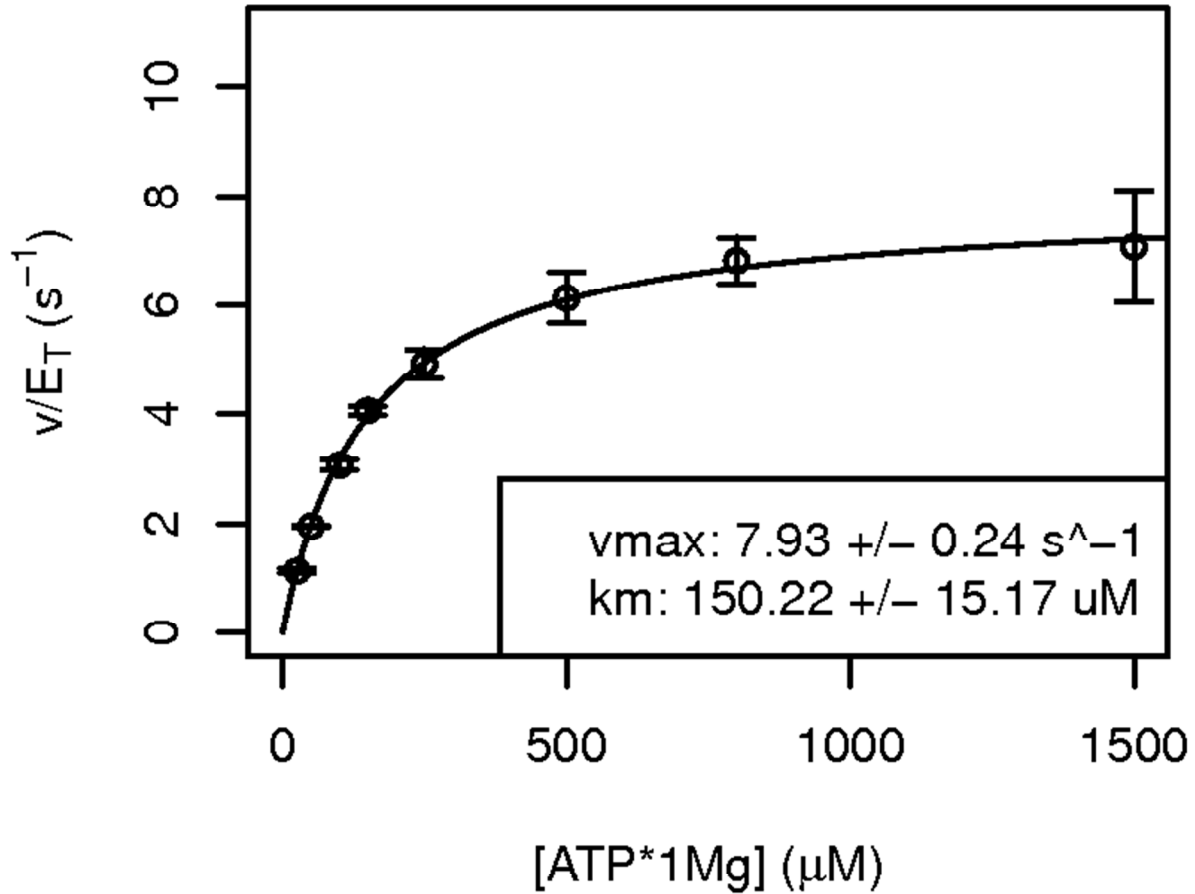

*Supplemental Figure 12*  $K_M$  for ATP•Mg substrate at 200  $\mu M$  [H1], 10 mM  $[Mg^{2+}]_{Free}$ . Error bars represent standard error for data point among multiple observations. KM curve fit using nonlinear least squares method to equation  $v/E_t = (v_{max} \cdot [ATP \cdot 1Mg]) / (k_m + [ATP \cdot 1Mg])$ . Total amounts of ATP/MgCl<sub>2</sub> calculated using  $K_D(ATP \cdot 1Mg) = 28.6 \mu M$ .

## KM ATP\*Mg 15mM [MgFree]

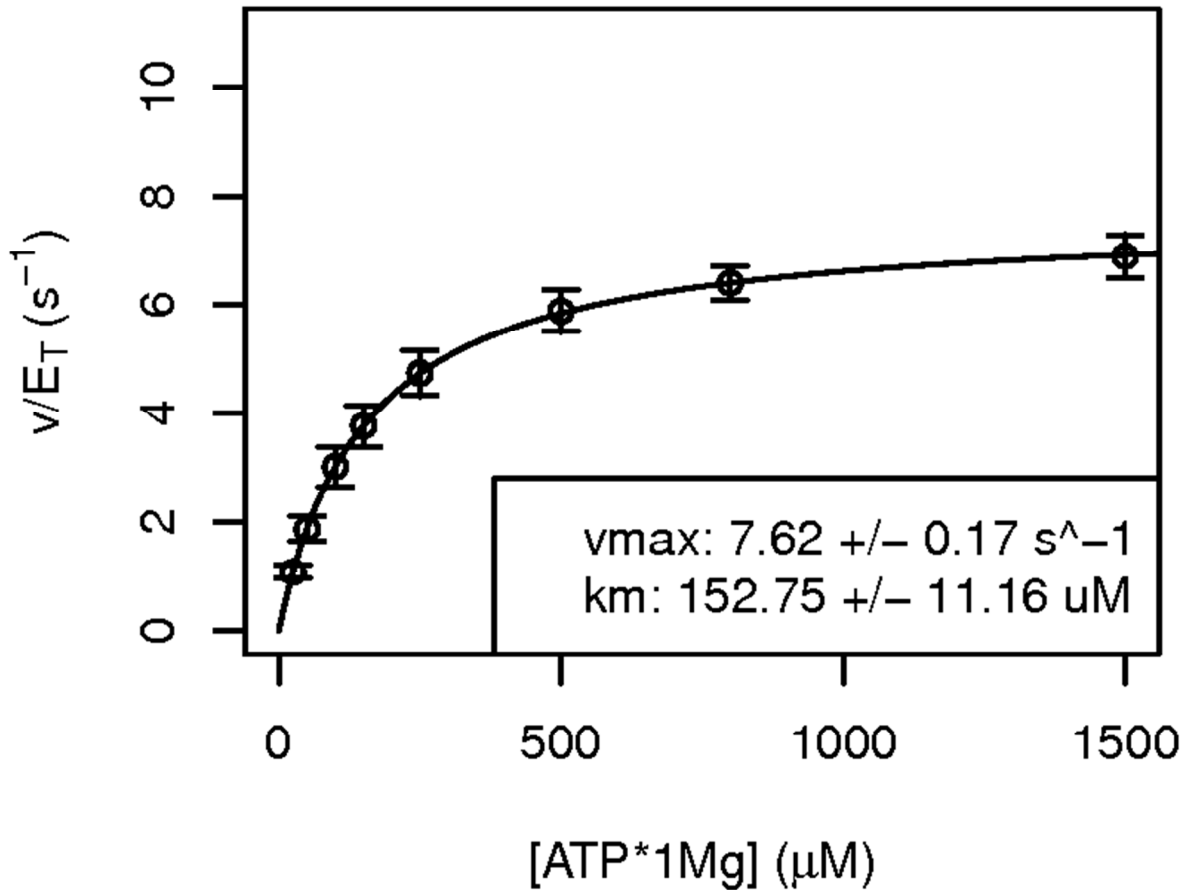

*Supplemental Figure 13*  $K_M$  for ATP•Mg substrate at 200  $\mu\text{M}$  [H1], 15 mM  $[\text{Mg}^{2+}]_{\text{Free}}$ . Error bars represent standard error for data point among multiple observations. KM curve fit using nonlinear least squares method to equation  $v/E_t = (v_{\text{max}} \cdot [\text{ATP} \cdot 1\text{Mg}]) / (k_m + [\text{ATP} \cdot 1\text{Mg}])$ . Total amounts of ATP/MgCl<sub>2</sub> calculated using  $K_D(\text{ATP} \cdot 1\text{Mg}) = 28.6 \mu\text{M}$ .

## KM ATP\*Mg 20mM [MgFree]

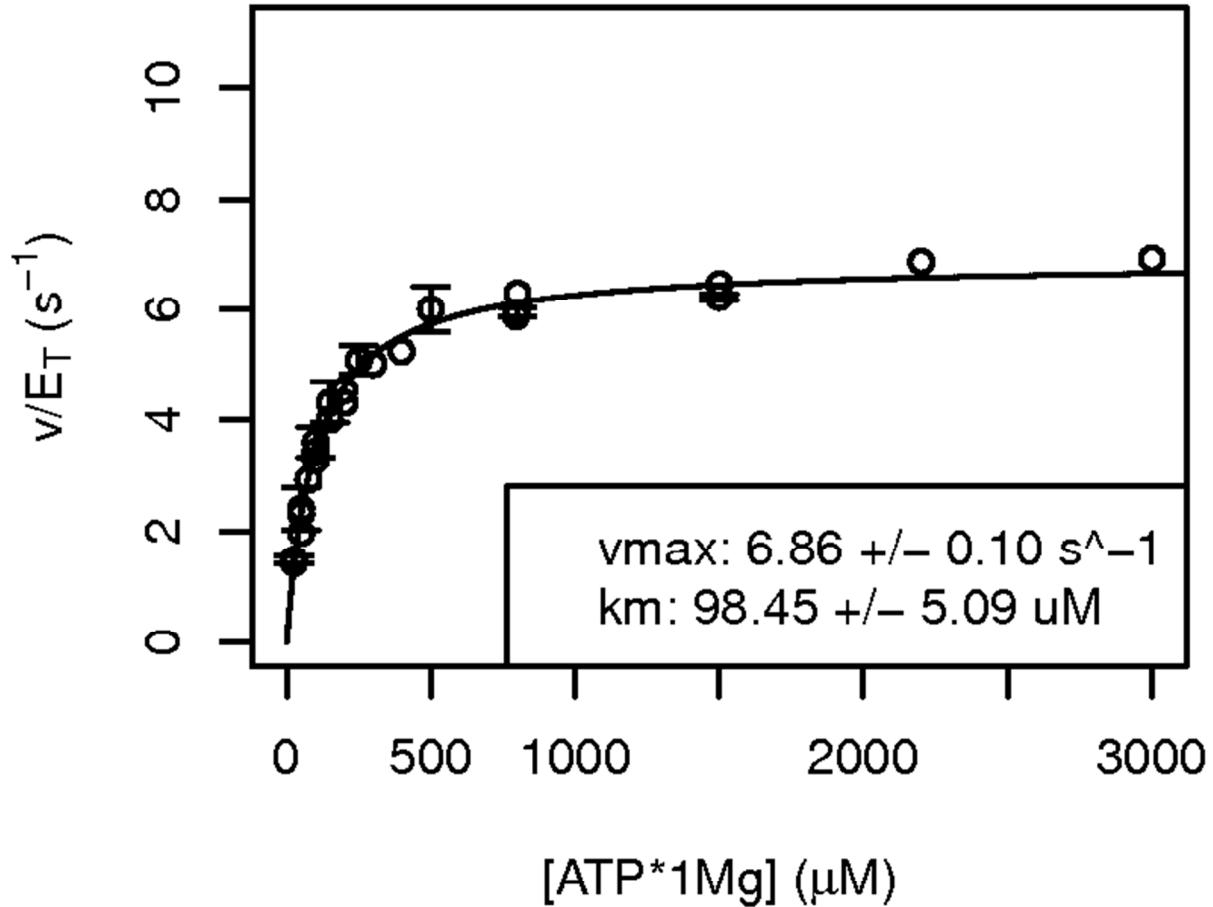

*Supplemental Figure 14*  $K_M$  for ATP•Mg substrate at 200  $\mu M$  [H1], 20 mM  $[Mg^{2+}]_{Free}$ . Error bars represent standard error for data point among multiple observations. KM curve fit using nonlinear least squares method to equation  $v/E_t = (v_{max} \cdot [ATP \cdot 1Mg]) / (k_m + [ATP \cdot 1Mg])$ . Total amounts of ATP/MgCl<sub>2</sub> calculated using  $K_D(ATP \cdot 1Mg) = 28.6 \mu M$ .

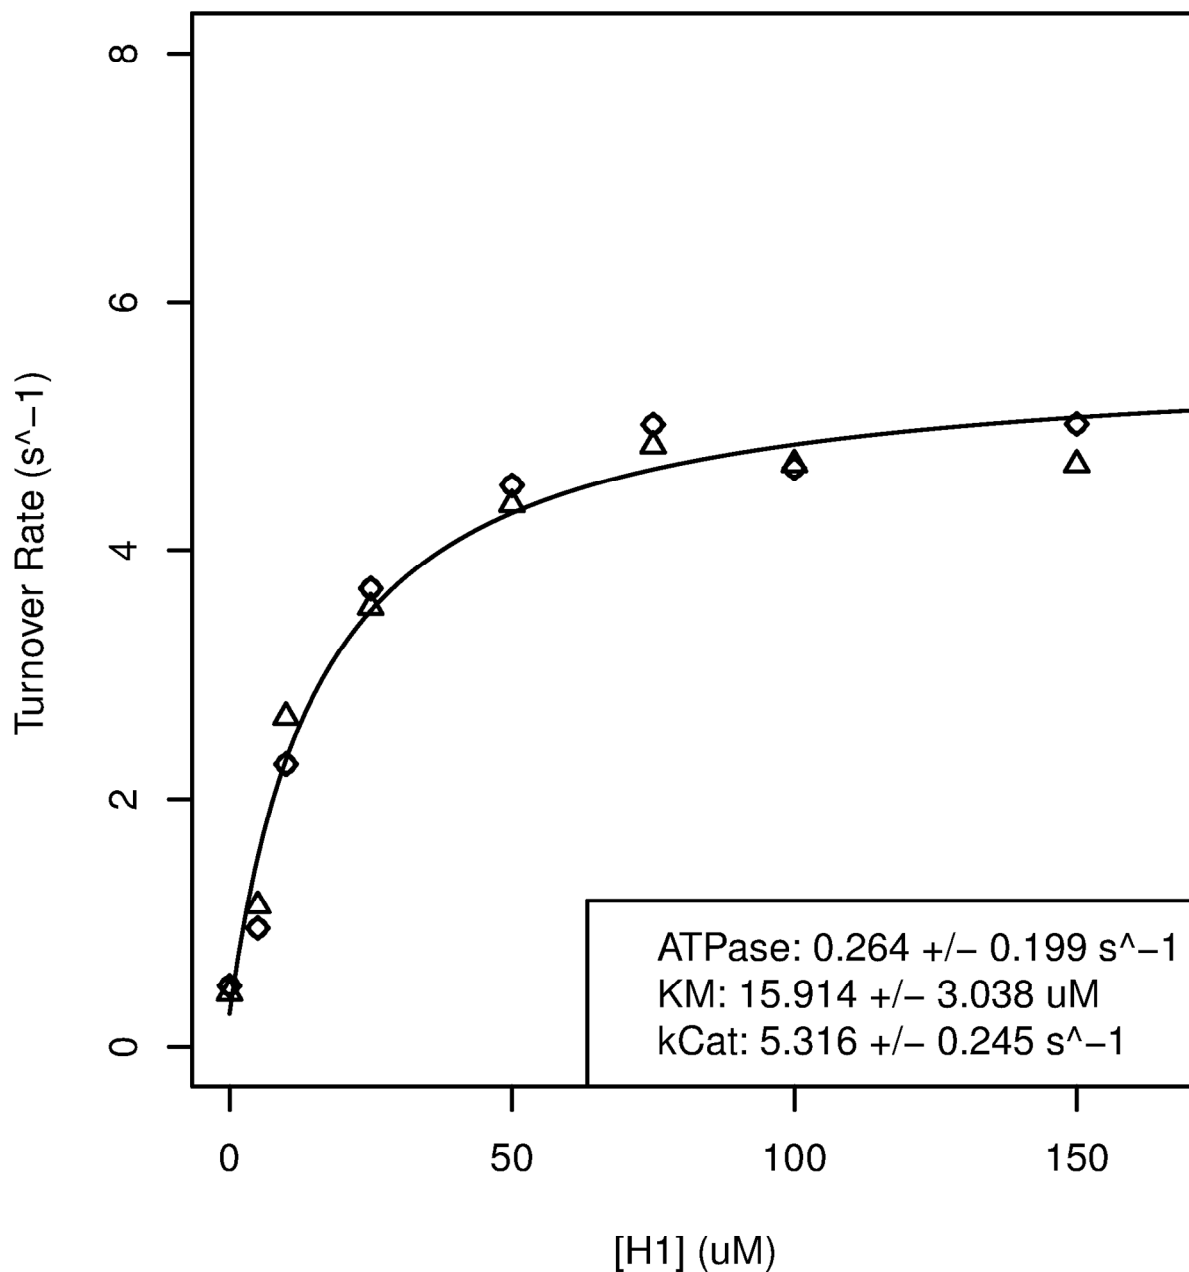

Supplemental Figure 15  $K_M$  for protein substrate at 800  $\mu\text{M}$  [ATP], 1 mM  $[\text{Mg}^{2+}]_{\text{Free}}$ .  $K_M$  curve fit using nonlinear least squares method to equation  $v/Et = \text{ATPase} + (k_{\text{Cat}} \cdot [\text{H1}]) / (K_M + [\text{H1}])$ . Total amounts of ATP/MgCl<sub>2</sub> calculated using  $K_D(\text{ATP} \cdot 1\text{Mg}) = 28.6 \mu\text{M}$ .



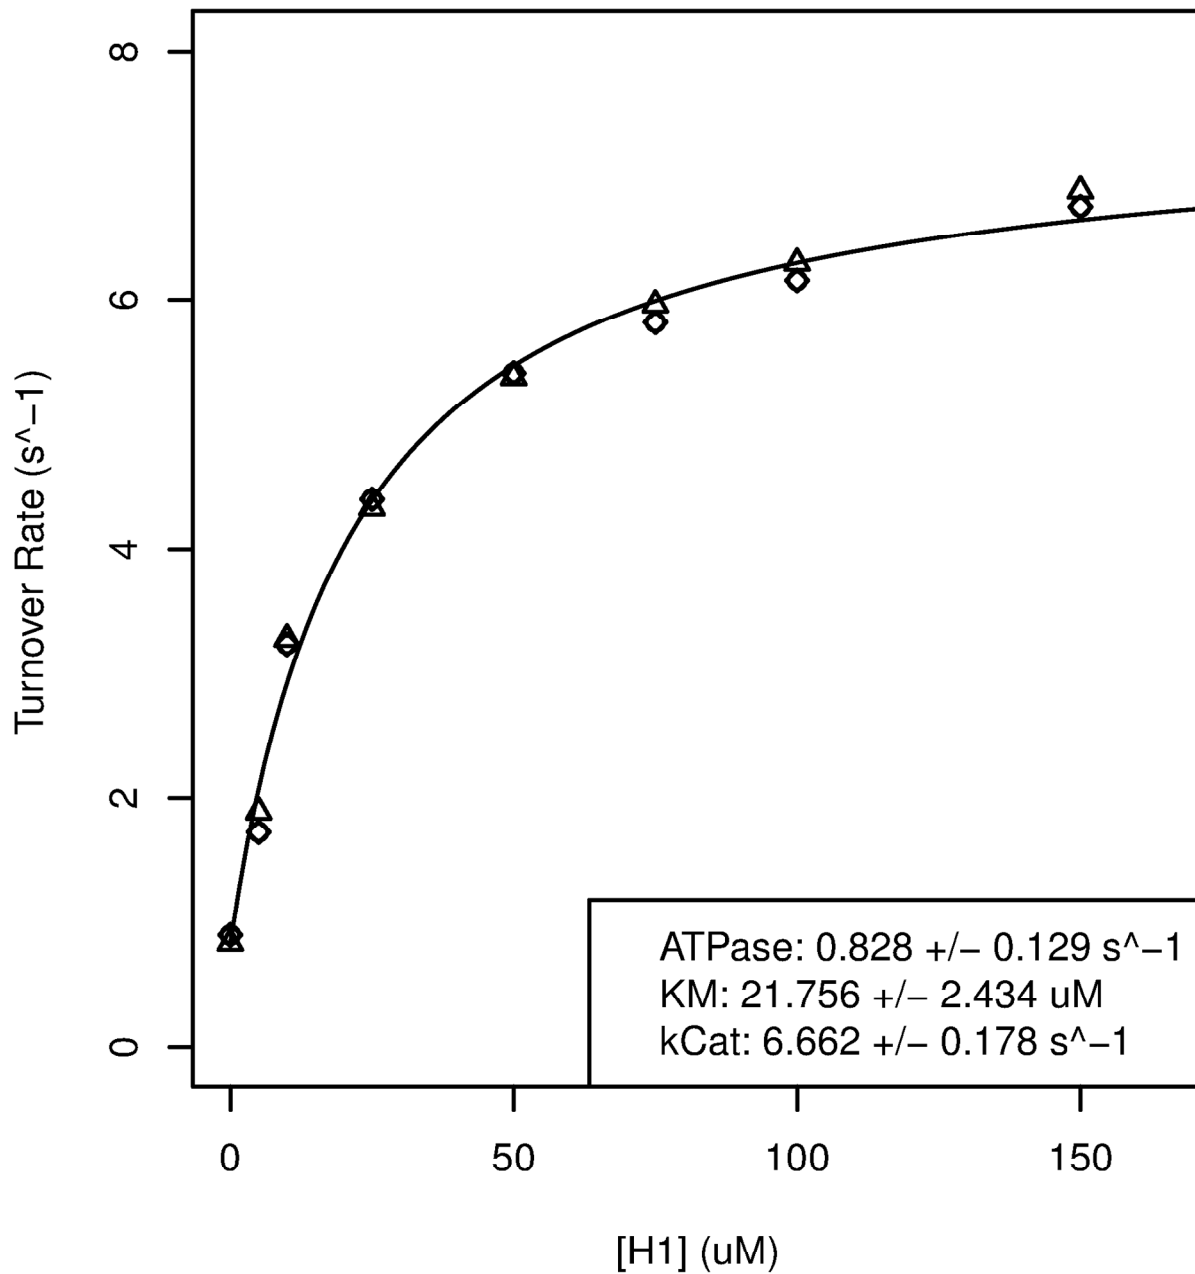

*Supplemental Figure 16*  $K_M$  for protein substrate at 800  $\mu\text{M}$  [ATP], 20 mM  $[\text{Mg}^{2+}]_{\text{Free}}$ . KM curve fit using nonlinear least squares method to equation  $v/Et = \text{ATPase} + (k_{\text{Cat}} \cdot [\text{H1}]) / (K_M + [\text{H1}])$ . Total amounts of ATP/MgCl<sub>2</sub> calculated using  $K_D(\text{ATP} \cdot 1\text{Mg}) = 28.6 \mu\text{M}$ .

## Solvent Viscosity Effect Experiments

Varying the solvent viscosity can help to discriminate the proportional contribution of specific steps of the catalytic cycle in the overall rate of catalysis. This is because the solvent viscosity alters the rate of diffusive steps (e.g. bi-molecular events such as substrate binding or product release) a great deal more than the rate of non-diffusive steps (e.g. the transfer of the  $\gamma$ -phosphate to the protein substrate).

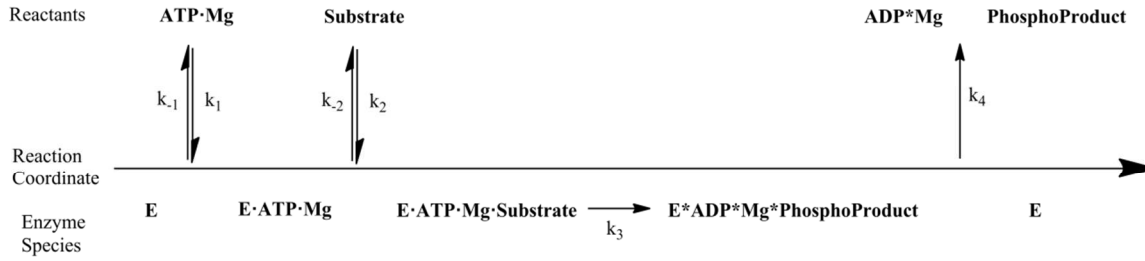

Scheme 1: Classic protein kinase reaction scheme

Microscopic rate constants are:  $k_1$  (ATP·Mg binding),  $k_{-1}$  (ATP·Mg release),  $k_2$  (Protein substrate binding),  $k_{-2}$  (Protein substrate release),  $k_3$  (Phosphoryl transfer), and  $k_4$  (Product release). Previous studies of CDK2 and other kinases suggest that the binding order of the ATP·Mg substrate and the protein substrate are randomly ordered. There is less information on when the 2<sup>nd</sup> Mg binds, but the structures predict it must be concomitant with ATP·Mg binding or after ATP·Mg binding. The apparent effect on  $K_M(\text{ATP}\cdot\text{Mg})$  of the 2<sup>nd</sup> Mg binding further supports the cooperative binding of the ATP·Mg and Mg substrates, so we assume that  $k_1$  and  $k_{-1}$  are the effective on and off net rate constants of the combined ATP·Mg and second Mg substrate at each  $[\text{ATP}\cdot\text{Mg}]$  and  $[\text{Mg}^{2+}]_{\text{Free}}$  condition.

If the ATP·Mg and protein substrates are saturating in the experimental conditions, then the rate of catalysis can be reduced to two sequential steps: phosphoryl transfer ( $k_3$ ) and then product release ( $k_4$ ), where only the rate of product release is affected by the solvent viscosity, such that the total flux through the catalytic cycle is given by (Adams, 2001):

$$k_{cat}^{App} = \frac{k_3^{App} * k_4^{App}}{k_3^{App} + k_4^{App}}$$

The “App” superscript is used in this case because  $k_{cat}$ ,  $k_3$  and  $k_4$  are considered separately for each  $[\text{Mg}^{2+}]_{\text{Free}}$ , and the binding of the 2<sup>nd</sup>  $\text{Mg}^{2+}$  ion may not be saturating at any of the tested  $[\text{Mg}^{2+}]_{\text{Free}}$ . The effect of the solvent viscosity,  $m$ , on  $k_{cat}^{App}$  is determined by measuring  $k_{cat}$  at several different solvent viscosities and then fitting a line to the equation:

$$\eta - 1 = m \left( \frac{k_{cat}^{\circ, App}}{k_{cat}^{App}} - 1 \right) ; \text{ where } \eta = \text{Relative Solvent Viscosity} = \frac{k_4^{\circ, App}}{k_4^{App}}$$

where  $\eta$  is the relative viscosity of the solvent,  $m$  is the viscosity effect,  $k_{cat}^{App}$  is the measured rate of the reaction at each [sucrose], and  $k_{cat}^{\circ,App}$  is the reference viscosity ([sucrose] = 0), and  $m$  is the slope of the line, which is the viscosity effect on  $k_{cat}^{App}$ . Substituting  $\eta$  with  $k_4^{\circ,App}/k_4^{App}$ ,  $k_{cat}^{\circ,App}$  with  $k_3^{App} * k_4^{\circ,App} / (k_3^{App} + k_4^{\circ,App})$ , and  $k_{cat}^{App}$  with  $k_3^{App} * k_4^{App} / (k_3^{App} + k_4^{App})$ , and then following algebraic manipulation of the above equation and solving for  $m$  gives:

$$m = \frac{k_3^{App}}{k_3^{App} + k_4^{\circ,App}} \quad \therefore \quad k_4^{\circ,App} = \frac{k_{cat}^{\circ,App}}{m} \quad \text{and} \quad k_3^{App} = \frac{k_{cat}^{\circ,App}}{1 - m}$$

where the  $^{\circ}$  superscript denotes that the rate constant is the [sucrose]=0 condition.

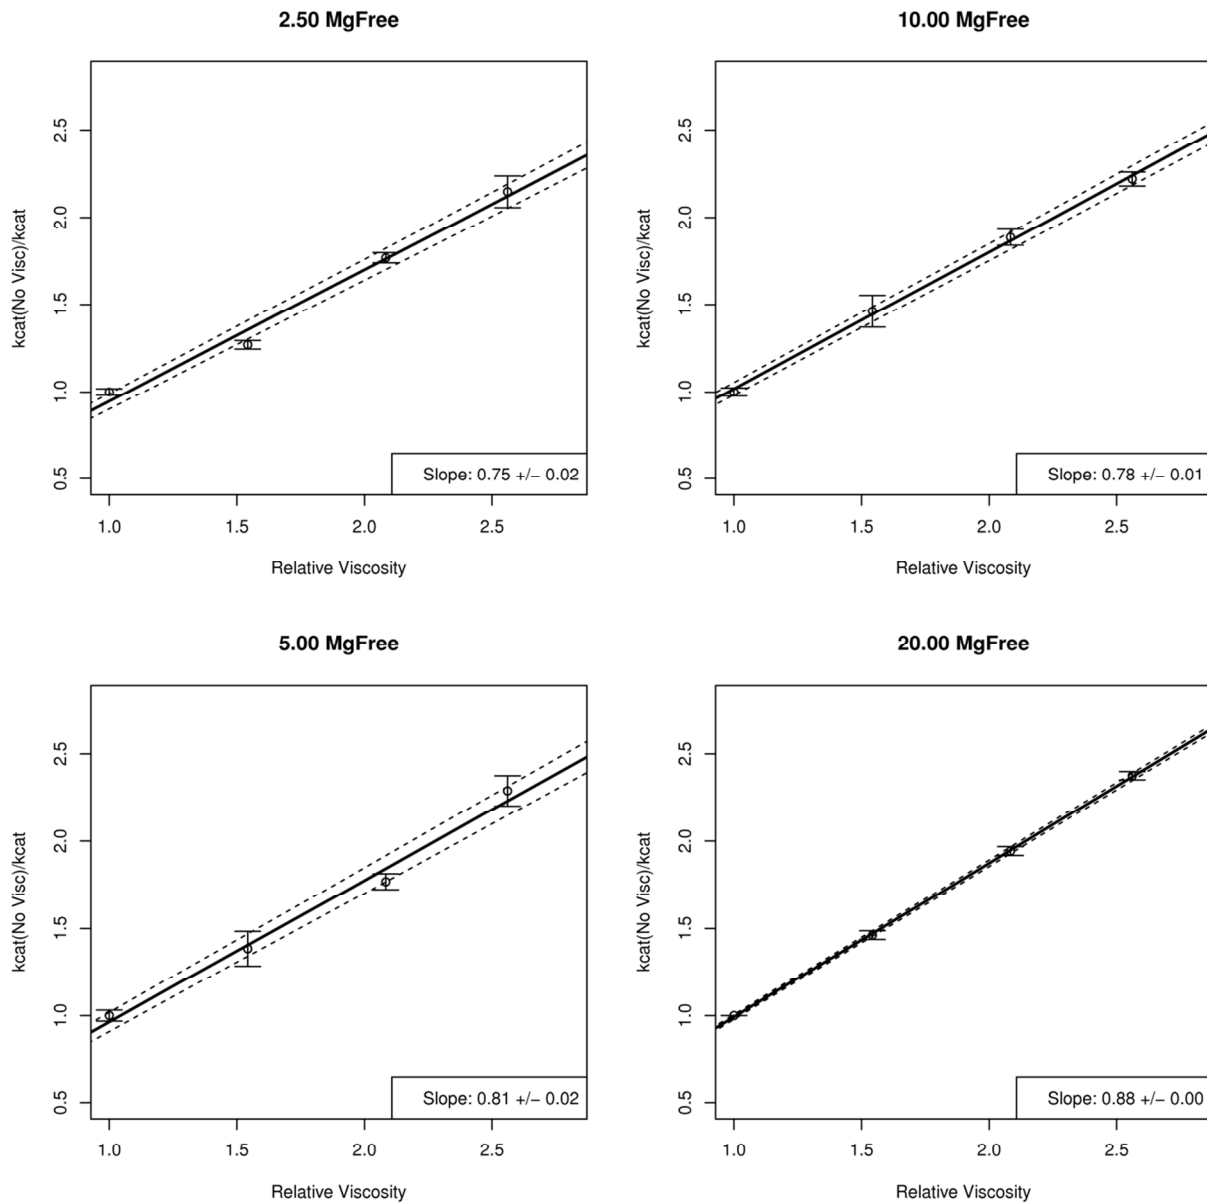

*Supplemental Figure 17* Solvent viscosity affect at constant 9.3 mM [ATP] at various  $[Mg^{2+}]_{Free}$ . This represents  $> 20x K_M(ATP \cdot Mg)$  at from 2.5 mM to 20 mM  $[Mg^{2+}]_{Free}$ . Total amounts of ATP/MgCl<sub>2</sub> calculated using  $K_D(ATP \cdot 1Mg) = 28.6 \mu M$ . Data points plotted at mean position for observations. Error bars represent standard error for multiple observations of data point. Solid black line is the fit linear model to the equation:  $v^0/v = m(\text{relativeViscosity}) + \text{intercept}$ , where the slope of the line  $m$  is the viscosity effect reported in figure 8A. Dotted lines show the potential variation of the linear fit based on the standard error of the fit intercept and slope  $m$ .

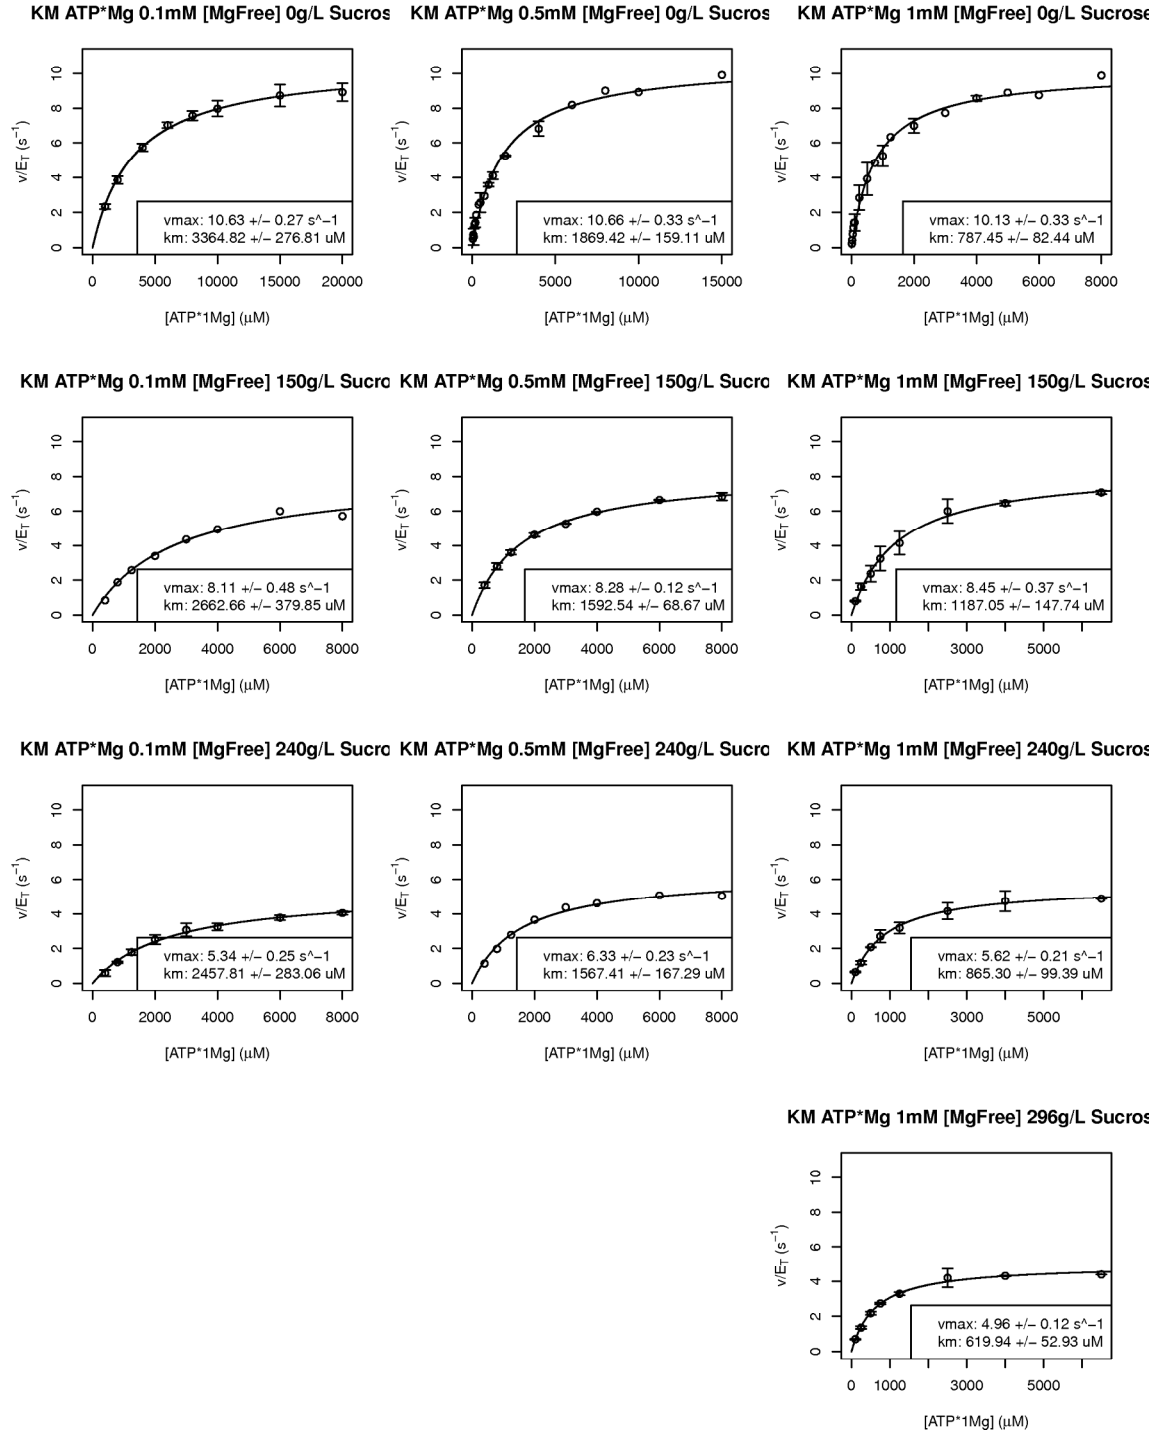

*Supplemental Figure 18*  $K_M$  for ATP•Mg substrate at 200  $\mu\text{M}$  [H1] at 0.1, 0.5 and 1  $[\text{Mg}^{2+}]_{\text{Free}}$ , and 0, 150, 240, 296 g/L Sucrose. Error bars represent standard error for data point among multiple observations. KM curve fit using nonlinear least squares method to equation  $v/E_t = (v_{max} \cdot [\text{ATP} \cdot \text{Mg}]) / (k_m + [\text{ATP} \cdot \text{Mg}])$ . Total amounts of ATP/MgCl<sub>2</sub> calculated using  $K_D(\text{ATP} \cdot \text{Mg}) = 28.6 \mu\text{M}$ .

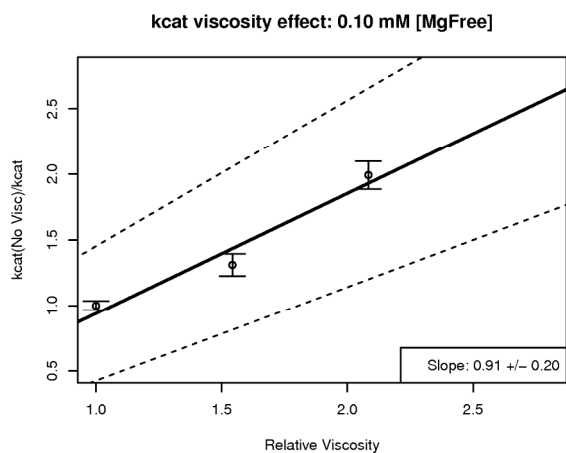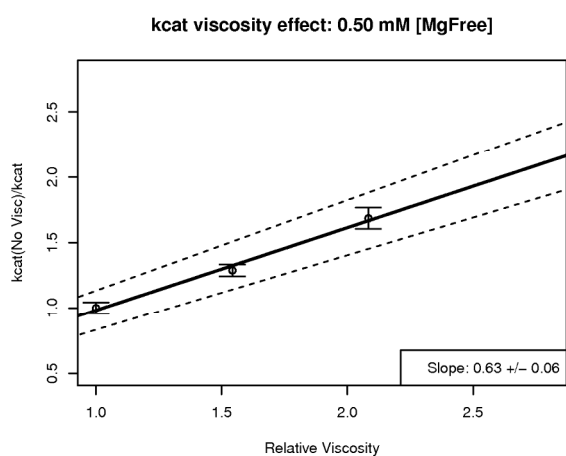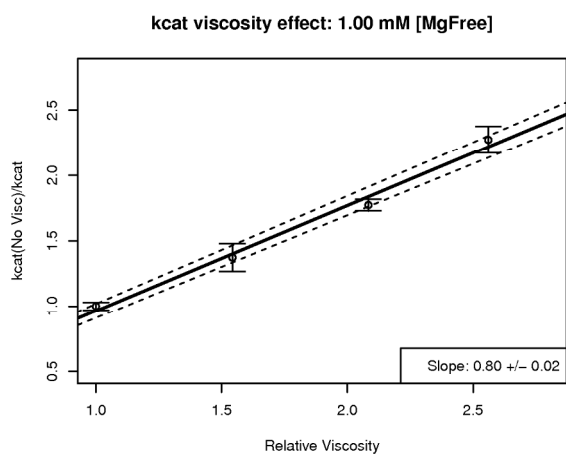

*Supplemental Figure 19* Solvent viscosity affect at calculated  $k_{cat}$  at 0.1 mM, 0.5 mM, and 1 mM  $[Mg^{2+}]_{Free}$  (from Supplemental Figure 8). Error bars represent standard error for nonlinear fit of  $k_{cat}$ . Solid black line is the fit linear model to the equation:  $v^o/v = m(\text{relativeViscosity}) + \text{intercept}$ , where the slope of the line  $m$  is the viscosity effect reported in figure 8A. Dotted lines show the potential variation of the linear fit based on the standard error of the fit intercept and slope  $m$ .

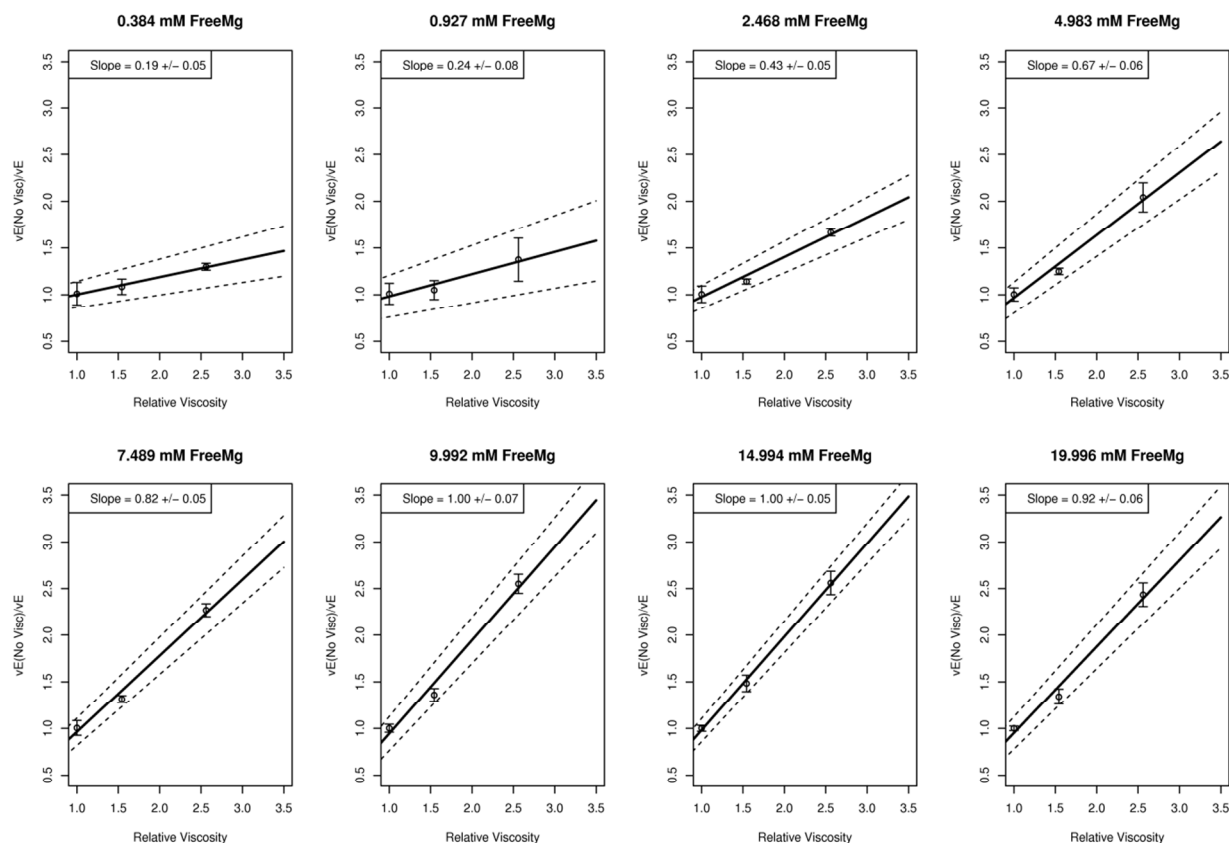

*Supplemental Figure 20* Solvent viscosity affect at constant 1.2 mM [ATP] at various  $[Mg^{2+}]_{Free}$  with saturating (200  $\mu$ M) protein substrate histone H1. At lower  $[Mg^{2+}]_{Free}$ , 1.2 mM [ATP] is subsaturating, but at high  $[Mg^{2+}]_{Free}$ , this condition does saturate. Total amounts of ATP/MgCl<sub>2</sub> calculated using  $K_D(ATP \cdot 1Mg) = 28.6 \mu$ M. Data points plotted at mean position for observations. Error bars represent standard error for multiple observations of data point. Solid black line is the fit linear model to the equation:  $v^\circ/v = m(\text{relativeViscosity}) + \text{intercept}$ , where the slope of the line  $m$  is the viscosity effect reported in figure 8B. Dotted lines show the potential variation of the linear fit based on the standard error of the fit intercept and slope  $m$ .

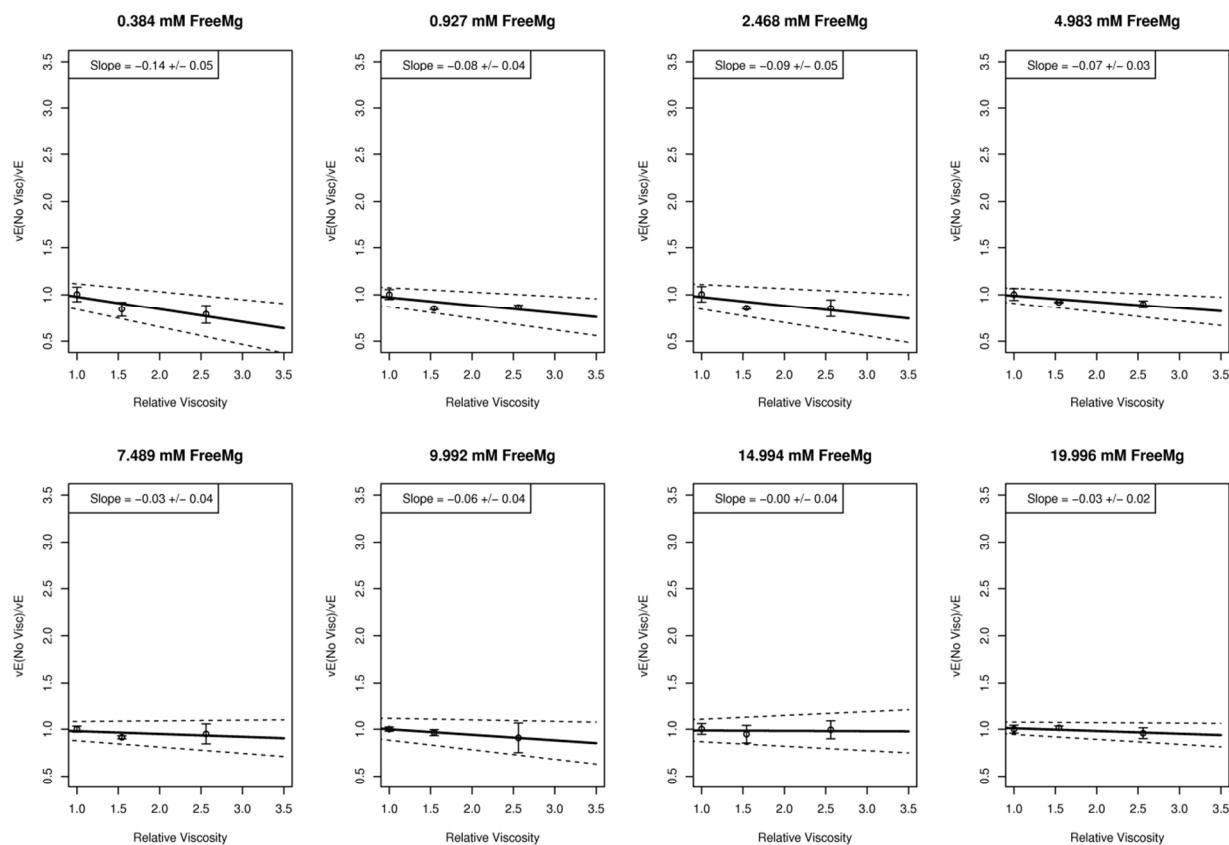

*Supplemental Figure 21* Solvent viscosity affect at constant 1.2 mM [ATP] at various  $[Mg^{2+}]_{Free}$  with **no protein substrate** (water as substrate). Total amounts of ATP/MgCl<sub>2</sub> calculated using  $K_D(ATP \cdot 1Mg) = 28.6 \mu M$ . Data points plotted at mean position for observations. Error bars represent standard error for multiple observations of data point. Solid black line is the fit linear model to the equation:  $v^{\circ}/v = m(\text{relativeViscosity}) + \text{intercept}$ , where the slope of the line  $m$  is the viscosity effect reported in figure 8B. Dotted lines show the potential variation of the linear fit based on the standard error of the fit intercept and slope  $m$ .



pCDK2/Cyclin ATPase activity with 1.2mM [ATP]

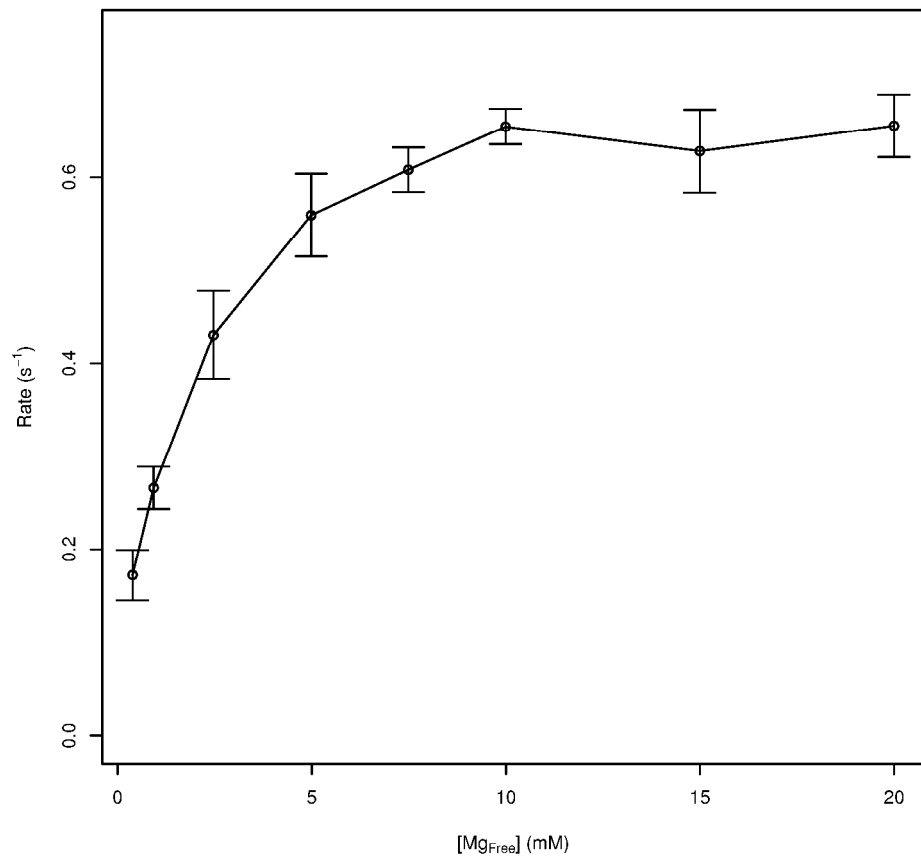

Supplemental Figure 22 Rate of pCDK2/Cyclin ATPase reaction vs.  $[Mg^{2+}]_{Free}$  with 1.2 mM [ATP] and 0 protein substrate H1. Total amounts of ATP/MgCl<sub>2</sub> calculated using  $K_D(ATP \cdot 1Mg) = 28.6 \mu M$ . Data points plotted at mean position for observations. Error bars represent standard error for multiple observations of data point.

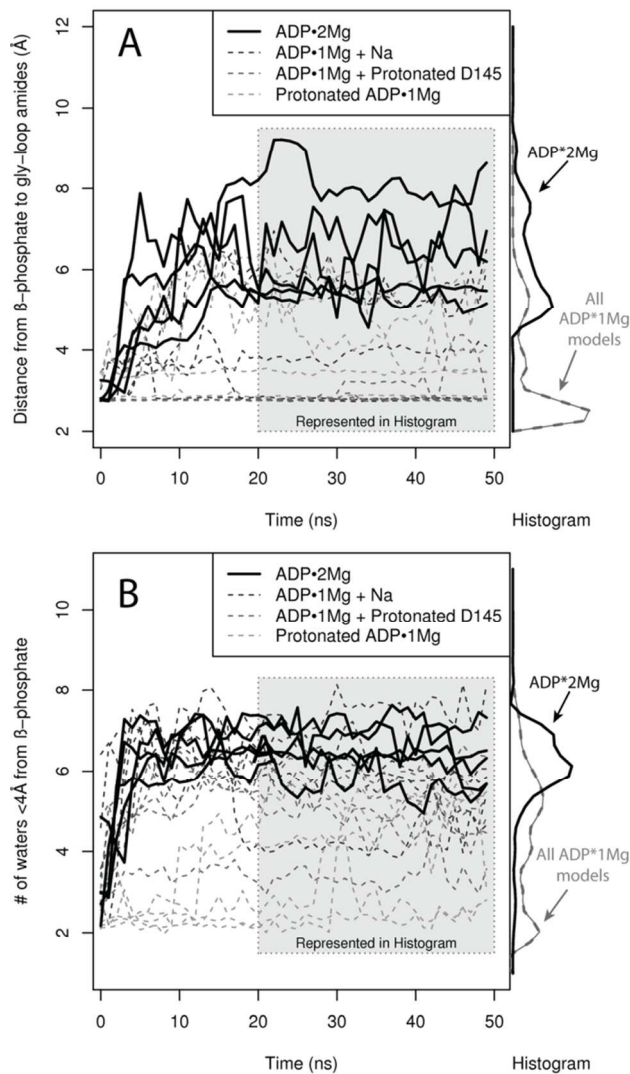

*Supplemental Figure 23.* Probability of gly-loop opening in MD simulations increased with two  $\text{Mg}^{2+}$  ions. MD started from closed gly-loop conformation with either ADP•2Mg coordination (solid black lines) or ADP•1Mg-type coordination (dashed gray lines). Each ADP coordination model simulated five times. Each curve in time series plot represents a single trajectory. Histograms integrate the last 30ns from all ADP•2Mg or ADP•1Mg-type trajectories into a single curve. **Panel A)** Distance between gly-loop amides and ADP  $\beta$ -phosphate. ADP•2Mg simulations consistently open gly-loop within simulation timescale, ADP•1Mg-type simulations do not. **Panel B)** Open gly-loop conformation increases solvent accessibility of phosphates. Number of waters around  $\beta$ -phosphate in ADP•2Mg simulations increases rapidly and then maintains a steady population of 6-7 waters around  $\beta$ -phosphate. ADP•1Mg-type simulations sample closed, intermediate, and open conformations which allow 2 to 7 waters to interact within 4Å of  $\beta$ -phosphate.

**Table 1.** X-Ray Crystallography Statistics

|                                                        | ADP•2Mg (PDB XXXX)         | ADP•1Mg (PDB XXXX)         |
|--------------------------------------------------------|----------------------------|----------------------------|
| <i>Data Collection</i>                                 |                            |                            |
| Wavelength (Å)                                         | 0.97856                    | 0.97856                    |
| Resolution range (Å)                                   | 43.12 - 2.05 (2.16 - 2.05) | 29.56 - 2.15 (2.27 - 2.15) |
| Space group                                            | P 1 2 <sub>1</sub> 1       | P 1 2 <sub>1</sub> 1       |
| Unit cell parameters a, b, c (Å)                       | 70.77, 164.13, 73.28       | 71.14, 164.14, 73.45       |
| Unit cell parameters $\alpha$ , $\beta$ , $\gamma$ (°) | 90, 107.07, 90             | 90, 107.04, 90             |
| Total observations                                     | 353627 (48178)             | 299094 (38261)             |
| Unique reflections                                     | 98449 (14154)              | 83146 (11033)              |
| Completeness (%)                                       | 98.6 (97.3)                | 95.5 (87.3)                |
| Mean I/ $\sigma$ (I)                                   | 7.5 (1.6)                  | 6.4 (1.5)                  |
| R <sub>merge</sub>                                     | 0.119 (0.857)              | 0.133 (0.964)              |
| Wilson B-factor (Å <sup>2</sup> )                      | 25.3                       | 31.1                       |
| <i>Refinement</i>                                      |                            |                            |
| R <sub>cryst</sub>                                     | 0.197                      | 0.199                      |
| R <sub>free</sub>                                      | 0.227                      | 0.227                      |
| Number of protein molecules per asymmetric unit        | 2 CDK2 + 2 Cyclin          | 2 CDK2 + 2 Cyclin          |
| Number of nonhydrogen atoms                            |                            |                            |
| Protein                                                | 8902                       | 8906                       |
| Ligand                                                 | 114                        | 104                        |
| Water                                                  | 521                        | 517                        |
| Average B-factor (Å <sup>2</sup> )                     | 39.6                       | 45.2                       |
| Ligand Average B-factor (Å <sup>2</sup> )              | 53.3                       | 62.7                       |
| RMSD from ideal                                        |                            |                            |
| Bond length (Å)                                        | 0.0076                     | 0.0103                     |
| Bond angle (°)                                         | 0.8868                     | 1.1769                     |
| Ramachandran plot (%)                                  |                            |                            |
| Most favored                                           | 99.09                      | 99.18                      |
| Additionally allowed                                   | 0.91                       | 0.64                       |

**Table 2.** Summary of Molecular Dynamics Simulations

|                                           | <b>Starting Structure &amp; Alterations</b>                                            | <b>Time</b> | <b>Mean Backbone RMSD (Å)</b> |
|-------------------------------------------|----------------------------------------------------------------------------------------|-------------|-------------------------------|
| <b>ADP•2Mg</b>                            | ADP•2Mg crystal                                                                        | 5x 50 ns    | 1.86 ± 0.22                   |
| <b>ADP•1Mg</b>                            | ADP•1Mg crystal                                                                        | 5x 50 ns    | 1.88 ± 0.29                   |
| <b>ADP•1Mg + Na</b>                       | ADP•1Mg crystal with Na <sup>+</sup> positioned in MgI site                            | 5x 50 ns    | 1.84 ± 0.20                   |
| <b>ADP•1Mg + ProtD145</b>                 | ADP•1Mg with D145 Protonated                                                           | 5x 50 ns    | 1.77 ± 0.21                   |
| <b>ProtADP•1Mg</b>                        | ADP•1Mg with β-phosphate protonated                                                    | 5x 50 ns    | 1.75 ± 0.20                   |
| <b>Gly-down ADP•2Mg</b>                   | TS (3QHR) without MgF <sub>3</sub> or peptide                                          | 5x 50 ns    | 2.16 ± 0.29                   |
| <b>Gly-down ADP•1Mg + Na</b>              | TS (3QHR) without MgF <sub>3</sub> , peptide or MgI. Model Na <sup>+</sup> in MgI site | 5x 50 ns    | 2.28 ± 0.36                   |
| <b>Gly-down ADP•1Mg + Protonated D145</b> | TS (3QHR) without MgF <sub>3</sub> , peptide or MgI. Protonate D145.                   | 5x 50 ns    | 2.17 ± 0.26                   |
| <b>Gly-down protADP•1Mg</b>               | TS (3QHR) without MgF <sub>3</sub> , peptide or MgI. Protonate β-phosphate.            | 5x 50 ns    | 2.32 ± 0.53                   |

## References

Due to space restrictions the author list for Gaussian03 was truncated in the original publication. The full reference appears here:

(32) Frisch, M. J.; Trucks, G. W.; Schlegel, H. B.; Scuseria, G. E.; Robb, M. A.; Cheeseman, J. R.; Montgomery, J.; Vreven, T.; Kudin, K. N.; Burant, J. C.; Millam, J. M.; Iyengar, S. S.; Tomasi, J.; Barone, V.; Mennucci, B.; Cossi, M.; Scalmani, G.; Rega, N.; Petersson, G. A.; Nakatsuji, H.; Hada, M.; Ehara, M.; Toyota, K.; Fukuda, R.; Hasegawa, J.; Ishida, M.; Nakajima, T.; Honda, Y.; Kitao, O.; Nakai, H.; Klene, M.; Li, X.; Knox, J. E.; Hratchian, H. P.; Cross, J. B.; Bakken, V.; Adamo, C.; Jaramillo, J.; Gomperts, R.; Stratmann, R. E.; Yazyev, O.; Austin, A. J.; Cammi, R.; Pomelli, C.; Ochterski, J. W.; Ayala, P. Y.; Morokuma, K.; Voth, G. A.; Salvador, P.; Dannenberg, J. J.; Zakrzewski, V. G.; Dapprich, S.; Daniels, A. D.; Strain, M. C.; Farkas, O.; Malick, D. K.; Rabuck, A. D.; Raghavachari, K.; Foresman, J. B.; Ortiz, J. V.; Cui, Q.; Baboul, A. G.; Clifford, S.; Cioslowski, J.; Stefanov, B. B.; Liu, G.; Liashenko, A.; Piskorz, P.; Komaromi, I.; Martin, R. L.; Fox, D. J.; Keith, T.; Al-Laham, M. A.; Peng, C. Y.; Nanayakkara, A.; Challacombe, M.; Gill, P. M. W.; Johnson, B.; Chen, W.; Wong, M. W.; Gonzalez, C.; Pople, J. A. *Gaussian 03, C.02*.
